# Supplementary material for: ZmIBH1-1 regulates plant architecture in maize
Source: PubMed Central journal article supplement (PMC7260713; doi:10.1093/jxb/eraa052), 2020-01-28
Supplement: eraa052_suppl_supplementary_figures.pdf [file eraa052_suppl_supplementary_figures.pdf]

|            |                                                                                                                       |      |
|------------|-----------------------------------------------------------------------------------------------------------------------|------|
| Yu82.seq   | <b>ATG</b> <b>CC</b> CAGGAAGAGGACGGCGCGCCATCAGCACAGGAACACCGCCAAACCTAACCTACCTCCGCCCGCGGGCCGCGCCAGCACCCGGCCCT           | 100  |
| Yu87-1.seq | <b>ATG</b> <b>CC</b> CAGGAAGAGGACGGCGCGCCATCAGCACAGGAACACCGCCAAACCTAACCTACCTCCGCCCGCGGGCCGCGCCAGCACCCGGCCCT           | 100  |
| Consensus  | atggccaggaagaggacggcgccgccaatcagcaccaggaacccaccgccaacccctaaccctaacctccgcccggggccgcccagcagccggccct                     |      |
| Yu82.seq   | CGGACGAGCCCGCCGCGTCTCGAAGCGCATGCTGGCCCTTTCACCTTCTCCGCGCGTGGCCAGGATCCACAGCACACCCCGCGCCGCGCCCGCGG                       | 200  |
| Yu87-1.seq | CGGACGAGCCCGCCGCGTCTCGAAGCGCATGCTGGCCCTTTCACCTTCTCCGCGCGTGGCCAGGATCCACAGCACACCCCGCGCCGCGCCCGCGG                       | 200  |
| Consensus  | cggacgagcccgccgcccgtcgtcgaagcgcatgctggccctttcacttctccgcccgtggccaggatccacagcaccaccccgccgcccggccgcccgg                  |      |
| Yu82.seq   | CACCATCCGCCCGCGGGCCCTACTCGTCCATGGCGCGCGCTCCGACCCAGCCCGGGCTGGACGCAAGCGGTGCTCCGCCAGGCTCGCGCGCGCAGGGGG                   | 300  |
| Yu87-1.seq | CACCATCCGCCCGCGGGCCCTACTCGTCCATGGCGCGCGCTCCGACCCAGCCCGGGCTGGACGCAAGCGGTGCTCCGCCAGGCTCGCGCGCGCAGGGGG                   | 300  |
| Consensus  | caccatccgcccggccctactcgtccatggcgccgctgcccaccacgcccggcctggacgcaagcgctgctccgcccaggctcggccgcccagggcg                     |      |
| Yu82.seq   | GCTGCCAGGTCCTCCAGGGAGCCGTCCTGCTCGGAGACGCGTCCGCTCCGCCGCGCGTCTCTCCGCCCGCGTCTCTCCGCCAGCAGCCGGGGAGT                       | 400  |
| Yu87-1.seq | GCTGCCAGGTCCTCCAGGGAGCCGTCCTGCTCGGAGACGCGTCCGCTCCGCCGCGCGTCTCTCCGCCCGCGTCTCTCCGCCAGCAGCCGGGGAGT                       | 400  |
| Consensus  | gctgccaggtcctccagggagccgctcctgctcggagacgctgctcctccgcccggcgtcctcctccgcccggcgtcctccgcccagcgcccggggagt                   |      |
| Yu82.seq   | CGACGTCGCGCCGAGCCGCTGC...CTCCGCCCGCGTGGCGCCCGGGCCCGCCCTCCGAGGCAGCCCGGGAAACCGCCAGGGCCGACCGCTCCG                        | 497  |
| Yu87-1.seq | CGACGTCGCGCCGAGCCGCTGC <b>TGG</b> CTCCGCCCGCGTGGCGCCCGGGCCCGCCCTCCGAGGCAGCCCGGGAAACCGCCAGGGCCGACCGCTCCG               | 500  |
| Consensus  | cgacgtcggccgagccgctggtggctccgcccggcgtggcgcccggggcccgcctccgagggcagggccgggaaacccggccagggccgacgctccg                     |      |
| Yu82.seq   | CCGGCTCGTCCCGCGCGCGGAGATGGAGTACGGCAGCCTCTCCGACGAGACCGCGACTACGTGCGCTCCCTCCGCCCGCAGGTGCAGTCAATGCAG                      | 597  |
| Yu87-1.seq | CCGGCTCGTCCCGCGCGCGGAGATGGAGTACGGCAGCCTCTCCGACGAGACCGCGACTACGTGCGCTCCCTCCGCCCGCAGGTGCAGTCAATGCAG                      | 600  |
| Consensus  | ccggctcgtcccggcgccgagatggagtagcggcagcctcctcgacgagacggcagactacgtgctcctccgcccaggtgcagctcatgcag                          |      |
| Yu82.seq   | AGCCTCGTCGACCTCTTCTCCGCCAA <b>TGA</b> TCGATCGTCCAACACCGAACCAAGTAATTAATTAATACCGCATGGTTAATTAATTC <b>TGTTCTAGCTTGC</b>   | 697  |
| Yu87-1.seq | AGCCTCGTCGACCTCTTCTCCGCCAA <b>TGA</b> TCGATCGTCCAACACCGAACCAAGTAATTAATTAATACCGCATGGTTAATTAATTC <b>TGTTCT...TGC</b>    | 696  |
| Consensus  | agcctcgtcgacctcttccgcccattgactcgtcgaacacccagcaagtaattaattaaccgcatggttaattaattcctgttctagcttgc                          |      |
| Yu82.seq   | ACCGTCCATCGTTCGCCCGCGCCGCCCTTTCGTATCTATATCATCGCATATCTCTTCTTCGTGCCACATATGAGATGGATGAGTGATTAAGATAGGAGA                   | 797  |
| Yu87-1.seq | ACCGTCCATCGTTCGCCCGCGCCGCCCTTTCGTATCTATATCATCGCATATCTCTTCTTCGTGCCACATATGAGATGGATGAGTGATTAAGATAGGAGA                   | 796  |
| Consensus  | accgctccatcgttcgcccggccgcccctttcgtatctatcatcgcataatctcttctcgtgccacatatgagatggatgagtgattagataggaga                     |      |
| Yu82.seq   | TTATTGAAAGAGATTGTTATTGCTGGTACATATATA <b>TTT</b> TAGTTGGTAAGATAAGATTATTAGTAGGTGTATGTATAGGTTGGGAACATACATGCATG           | 897  |
| Yu87-1.seq | TTATTGAAAGAGATTGTTATTGCTGGTACATATATA <b>TTT</b> TAGTTGGTAAGATAAGATTATTAGTAGGTGTATGTATAGGTTGGGAACATACATGCATG           | 896  |
| Consensus  | ttattgagaagattgttattgctggtagacatataatattagctggtaagataagattattagtaggtgtatgtataggttgggaaacatatacgcattg                  |      |
| Yu82.seq   | GAAGATGGTACCA <b>CGCC</b> CACACACCAAGCAGCAATTGGAGGGAGAGGAGATTATTATTGAGSTAATTAATTGTAACATATATA <b>AGAGAGAATTGAAGCA</b>  | 997  |
| Yu87-1.seq | GAAGATGGTACCA...CACACACCAAGCAGCAATTGGAGGGAGAGGAGATTATTATTGAGSTAATTAATTGTAACATATATA <b>AGAGAGAATTGAAGCA</b>            | 992  |
| Consensus  | gaagatggtaccacgcccacacacccaagcagcaattggagggagaggagattattattgaggttaatttaattgtaacatataagagagagaattgaagca                |      |
| Yu82.seq   | TGGAG <b>TC</b> CACATACATACATACATAAGCTATTAGTGCAGTCTTCTGCTGTGGGTGAGATGATTGGGTATGCATATAT <b>TTT</b> TGTAATAAATTGGAGCCAT | 1097 |
| Yu87-1.seq | TGGAG <b>CC</b> CACATACATACATACATAAGCTATTAGTGCAGTCTTCTGCTGTGGGTGAGATGATTGGGTATGCATATAT <b>TTT</b> TGTAATAAATTGGAGCCAT | 1092 |
| Consensus  | tggagccacatacatacatacataaagctattagtgtagcttctgctgtgggtcagatgattgggtatgcataatattttgtaaaaaatttggagccat                   |      |
| Yu82.seq   | <b>GTCATG</b>                                                                                                         | 1103 |
| Yu87-1.seq | <b>GTCATG</b>                                                                                                         | 1098 |
| Consensus  | gtcatg                                                                                                                |      |

**Supplementary figure1. Sequence alignment of Yu82 and Yu87-1.** Polymorphisms are highlighted in cyan and the predicted translation start of ZmIBH1-1 is boxed in yellow and the predicted termination codon of ZmIBH1-1 is boxed in red.



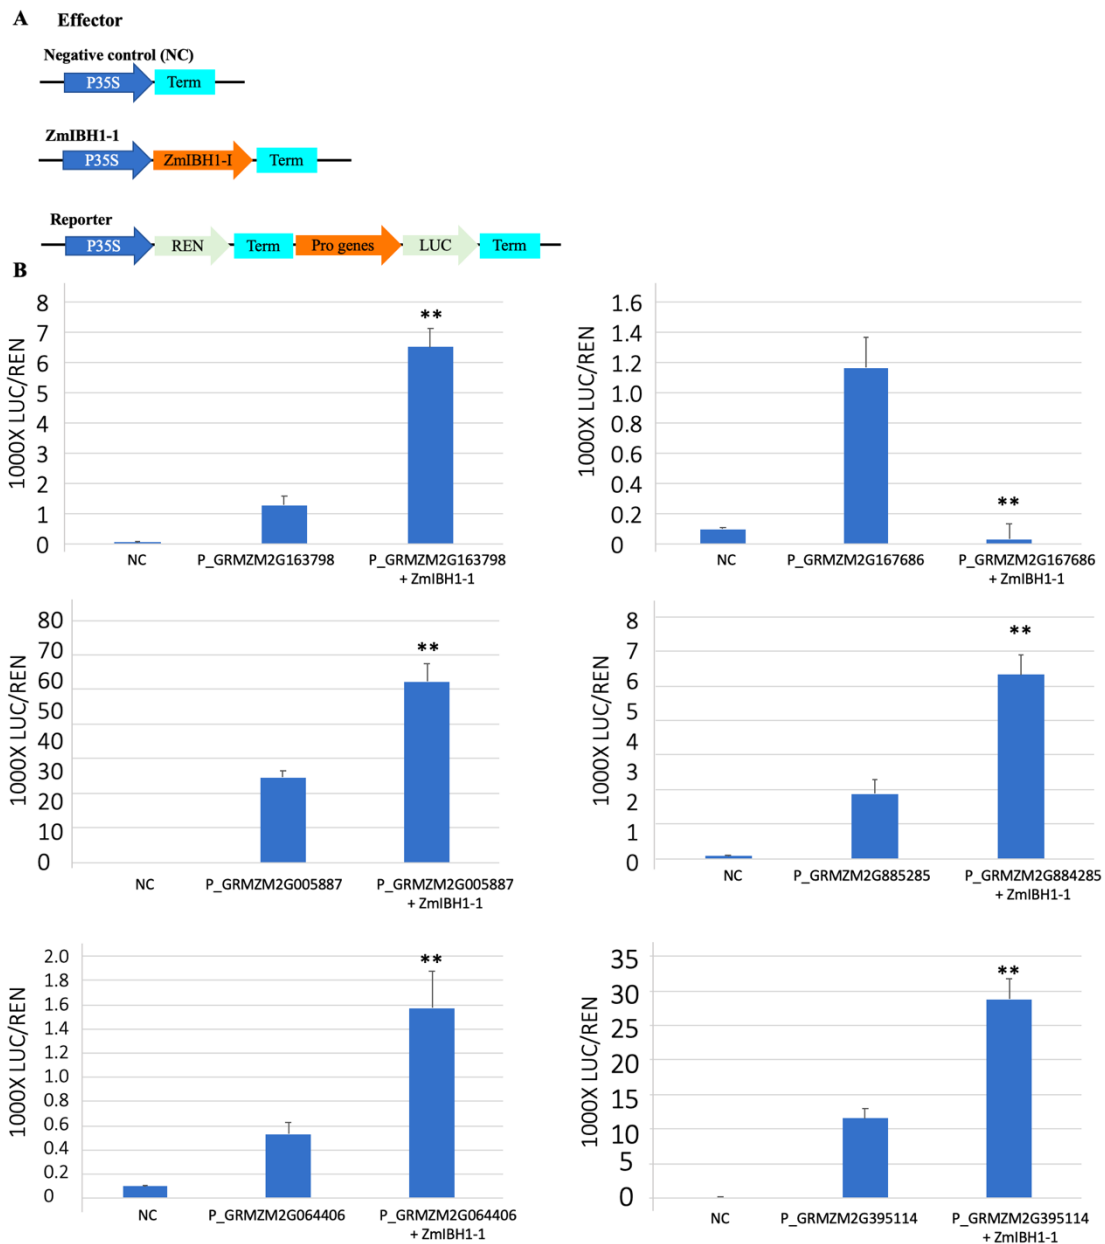

**Supplementary figure 3. Results of the dual-luciferase transient transcriptional activity assay.** (A) The 35S:REN-Pro zein:LUC reporter constructs were transiently expressed in onion epidermal cells together with control vector or 35S:ZmIBH1-1effector, respectively. (B) The expression level of Renilla (REN) was used as an internal control. The LUC/REN ratio represents the relative activity of candidate gene promoters. Data are values of three independent experiments. Significant differences from the corresponding control values (using Student's t test [n = 3]): \*P < 0.05, \*\*P < 0.01, and \*\*\*P < 0.001.
